# Supplementary material for: A “layer-by-layer” building strategy for the fabrication of a metal–hydrogel–metallic nanoarray plasmonic cavity with dynamic color display performance
Source: Royal Society of Chemistry journal article supplement (doi:10.1039/d2tc04360b), 2023-01-01
Supplement: d2tc04360b1.pdf [file d2tc04360b1.pdf]

## Supporting Information

"Layer-by-layer" building strategy for the fabrication of metal-hydrogel-metallic nanoarray plasmonic cavity with dynamic color display performance

*Dan Chen,<sup>‡</sup> Jiazhen Liu,<sup>‡</sup> Shunsheng Ye, Xuemin Zhang, Liying Zhang, Fuqiang Fan, Tieqiang*

*Wang,<sup>\*</sup> Yu Fu,<sup>\*</sup> Jianshe Hu<sup>\*</sup>*

<sup>†</sup>College of Sciences, Northeastern University, Shenyang 110819, P. R. China;

Email: wangtieqiang@mail.neu.edu.cn, fuyu@mail.neu.edu.cn and hujianshe@mail.neu.edu.cn

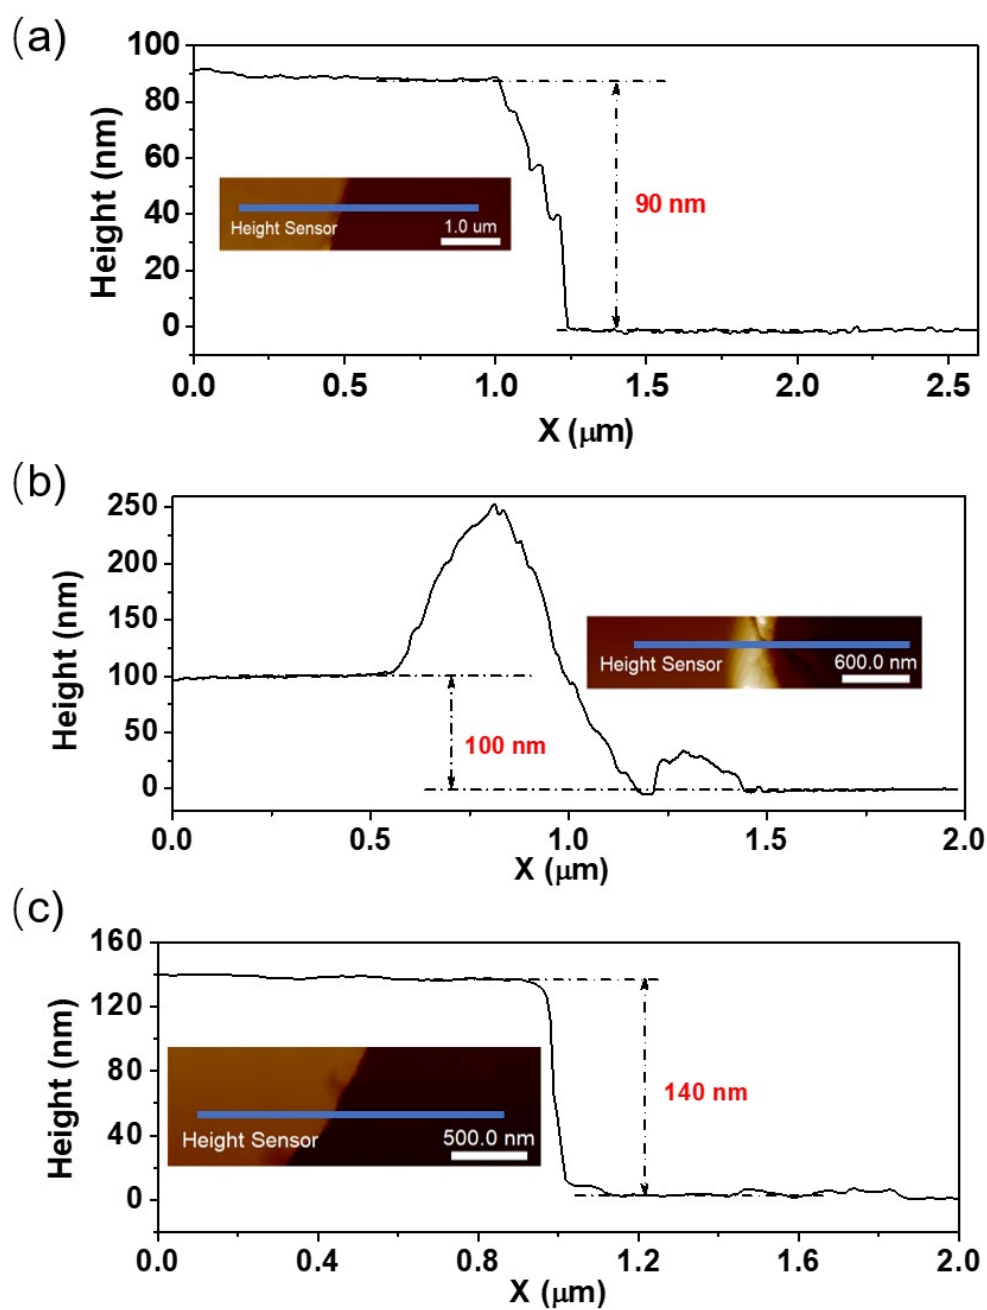

**Fig. S1** AFM images of PDMAEMA hydrogel in air. (a-c) thickness of PDMAEMA hydrogel obtained by spin-coating.
